# Supplementary material for: Siphon-driven microfluidic passive pump with a yarn flow resistance controller
Source: Royal Society of Chemistry journal article supplement (doi:10.1039/c4lc00510d), 2014-08-05

Supplementary Fig. 1  
Fabrication and flow initialization through the YFR integrated into the microflow control system.

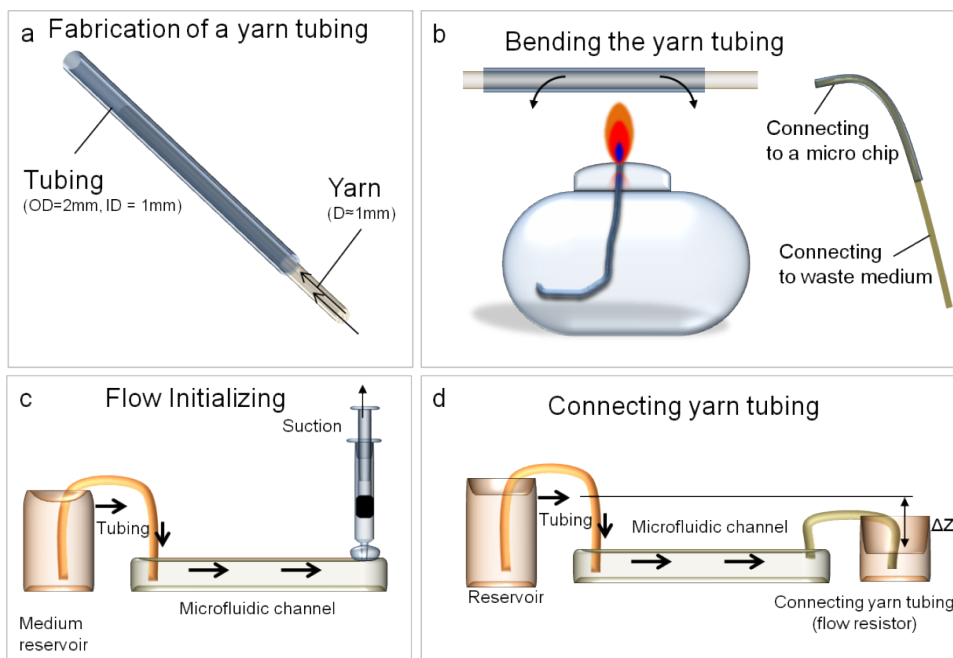

## Supplementary Fig. 2

Dimensions of the microfluidic channel and CFD analysis setting.

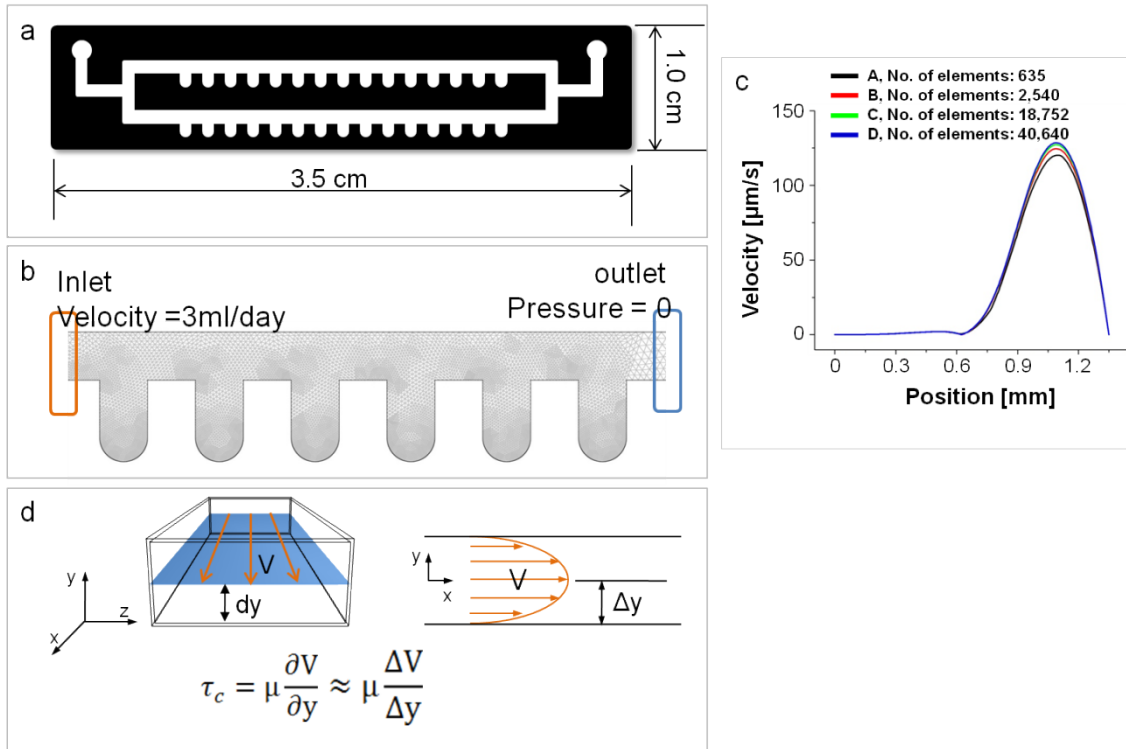

Supplementary Fig. 3

Optical microscopy images of the endothelial cell alignment under flow or static conditions at day 5 of culturing.

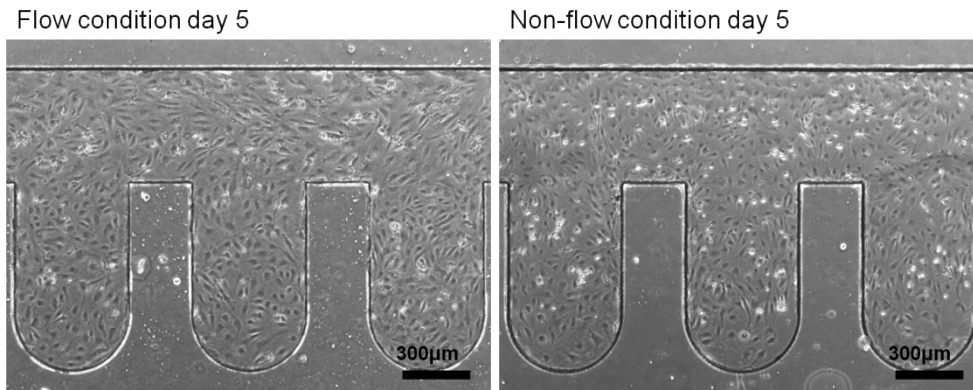

Supplement: c4lc00510d1.pdf [file c4lc00510d1.pdf]
